# Supplementary material for: Quantitative Changes in the Mitochondrial Proteome of Cerebellar Synaptosomes From Preclinical Cystatin B-Deficient Mice
Source: Front Mol Neurosci. 2020 Nov 13;13:570640. doi: 10.3389/fnmol.2020.570640 (PMC7691638; doi:10.3389/fnmol.2020.570640)
Supplement: Supplementary file 3 [file Table_2.xlsx]

## Sheet: Sheet1
Supplementary table 2. Differentially abundant proteins (q-value<0.05) between Cstb-/- and wild-type (wt) mice cerebellar synaptosomes
Uniprot ID	Protein name	FC (Cstb-/-/wt)	2log FC (Cstb-/-/wt)	p-value	q-value
Q62426	Cystatin-B	-42.68	-5.41	4.99762e-06	0
P56391	Cytochrome c oxidase subunit 6B1	26.87	4.74	9.99524e-06	0
P01942	Hemoglobin subunit alpha	10.00	3.32	1.49929e-05	0
P02088	Hemoglobin subunit beta-1	7.63	2.93	1.99905e-05	0
Q7TNV0	Protein DEK	-9.67	-3.27	2.49881e-05	0
Q80YX1	Tenascin	6.59	2.72	2.99857e-05	0
Q9DB05	Alpha-soluble NSF attachment protein	2.47	1.30	4.92623e-05	0
Q9CXI5	Mesencephalic astrocyte-derived neurotrophic factor	5.38	2.42	6.23513e-05	0
P42567	Epidermal growth factor receptor substrate 15	12.97	3.69	7.68682e-05	0
Q9WUM5	Succinate--CoA ligase [ADP/GDP-forming] subunit alpha, mitochondrial	2.73	1.45	9.40029e-05	0
Q9CYR0	Single-stranded DNA-binding protein, mitochondrial	-3.50	-1.80	0.000103046	0
Q9WVA4	Transgelin-2	2.49	1.31	0.000112089	0
P62897	Cytochrome c, somatic	-6.46	-2.69	0.000121133	0
B9EKR1	Receptor-type tyrosine-protein phosphatase zeta	3.14	1.65	0.00012613	0
P62748	Hippocalcin-like protein 1	-2.19	-1.13	0.000131128	0
Q8CIM3	D-2-hydroxyglutarate dehydrogenase, mitochondrial	3.07	1.62	0.000139695	0
O88447	Kinesin light chain 1	2.24	1.16	0.000188244	0
Q91VN4	MICOS complex subunit Mic25	2.32	1.21	0.000193241	0
Q9CPQ8	ATP synthase subunit g, mitochondrial	2.93	1.55	0.000198239	0
Q6PEB6	MOB-like protein phocein	3.91	1.97	0.000215612	0
P09405	Nucleolin	3.63	1.86	0.000224655	0
Q9D5T0	ATPase family AAA domain-containing protein 1	2.86	1.51	0.000246787	0
P60603	Reactive oxygen species modulator 1	3.15	1.65	0.000255355	0
P62983	Ubiquitin-40S ribosomal protein S27a	-3.13	-1.64	0.000278201	0
Q99KQ4	Nicotinamide phosphoribosyltransferase	2.16	1.11	0.000316516	0
Q61937	Nucleophosmin	5.51	2.46	0.000353403	0
O89029	Matrilin-4	3.49	1.80	0.000410043	0
P28663	Beta-soluble NSF attachment protein	1.92	0.94	0.000422894	0
P58044	Isopentenyl-diphosphate Delta-isomerase 1	2.05	1.04	0.000532842	0
Q99LC3	NADH dehydrogenase [ubiquinone] 1 alpha subcomplex subunit 10, mitochondrial	1.86	0.89	0.0005495	0
P38060	Hydroxymethylglutaryl-CoA lyase, mitochondrial	2.35	1.23	0.000580438	0
Q99LY9	NADH dehydrogenase [ubiquinone] iron-sulfur protein 5	2.66	1.41	0.000589243	0
P62075	Mitochondrial import inner membrane translocase subunit Tim13	2.89	1.53	0.000625654	0
Q3TPX4	Exocyst complex component 5	3.24	1.69	0.000669919	0
Q8BVI4	Dihydropteridine reductase	1.92	0.94	0.000695145	0
Q923S9	Ras-related protein Rab-30	1.91	0.94	0.000744883	0
P13707	Glycerol-3-phosphate dehydrogenase [NAD	1.92	0.94	0.000761542	0
Q8JZN7	Mitochondrial Rho GTPase 2	1.91	0.93	0.000816278	0
P70195	Proteasome subunit beta type-7	1.79	0.84	0.000821276	0
Q9CPP6	NADH dehydrogenase [ubiquinone] 1 alpha subcomplex subunit 5	2.05	1.03	0.000845074	0
Q9D8T7	SRA stem-loop-interacting RNA-binding protein, mitochondrial	2.15	1.11	0.000850071	0
Q9Z0Y1	Dynactin subunit 3	2.02	1.01	0.000934317	0
Q9D892	Inosine triphosphate pyrophosphatase	2.52	1.33	0.000953594	0
Q8BGT5	Alanine aminotransferase 2	3.35	1.74	0.00110709	0
Q8R164	Valacyclovir hydrolase	2.03	1.02	0.00112613	0
Q62442	Vesicle-associated membrane protein 1	-2.19	-1.13	0.0011585	0
Q6PB93	Polypeptide N-acetylgalactosaminyltransferase 2	1.83	0.87	0.0012306	0
Q9D0M5	Dynein light chain 2, cytoplasmic	-3.45	-1.78	0.00125012	0
Q62059	Versican core protein	2.84	1.50	0.00127035	0
Q9ET30	Transmembrane 9 superfamily member 3	2.28	1.19	0.00127535	0
P42669	Transcriptional activator protein Pur-alpha	-2.55	-1.35	0.00135198	0
Q5XJY5	Coatomer subunit delta	1.77	0.82	0.00138553	0
Q5FWK3	Rho GTPase-activating protein 1	-2.42	-1.27	0.00143812	0
P51881	ADP/ATP translocase 2	2.30	1.20	0.00149786	0
O08739	AMP deaminase 3	2.12	1.08	0.00152999	0
Q64471	Glutathione S-transferase theta-1	1.60	0.68	0.00156735	0
Q9JLJ2	4-trimethylaminobutyraldehyde dehydrogenase	1.69	0.76	0.00157235	0
Q01405	Protein transport protein Sec23A	1.87	0.90	0.0016316	0
Q9D7B6	Isobutyryl-CoA dehydrogenase, mitochondrial	1.65	0.72	0.0035802	0.0117647
Q8K3J1	NADH dehydrogenase [ubiquinone] iron-sulfur protein 8, mitochondrial	1.90	0.92	0.00356069	0.0119048
P36536	GTP-binding protein SAR1a	2.39	1.26	0.00353546	0.0120482
Q9ERG0	LIM domain and actin-binding protein 1	-1.73	-0.79	0.00343479	0.0121951
Q8BNY6	Neuronal calcium sensor 1	-1.74	-0.80	0.00333651	0.0123457
P29758	Ornithine aminotransferase, mitochondrial	1.71	0.77	0.00332056	0.0125
Q8BGD8	Cytochrome c oxidase assembly factor 6 homolog	1.79	0.84	0.0032387	0.0126582
P57780	Alpha-actinin-4	-1.66	-0.73	0.0032337	0.0128205
Q8BYI9	Tenascin-R	2.48	1.31	0.00321466	0.012987
Q8VEH5	EPM2A-interacting protein 1	1.54	0.62	0.00307592	0.0131579
Q8R3Q6	Coiled-coil domain-containing protein 58	2.21	1.14	0.00307092	0.0133333
Q9D8E6	60S ribosomal protein L4	1.89	0.91	0.00300119	0.0135135
P10404	MLV-related proviral Env polyprotein [Cleaved into: Surface protein	1.55	0.63	0.00298596	0.0136986
Q9D1G5	Leucine-rich repeat-containing protein 57	2.07	1.05	0.0029624	0.0138889
P60904	DnaJ homolog subfamily C member 5	-1.99	-0.99	0.00280057	0.0140845
P14152	Malate dehydrogenase, cytoplasmic	1.64	0.71	0.00278272	0.0142857
Q64010	Adapter molecule crk	-1.82	-0.86	0.0027149	0.0144928
Q922Q8	Leucine-rich repeat-containing protein 59	1.90	0.93	0.00240885	0.0147059
Q99J47	Dehydrogenase/reductase SDR family member 7B	-2.27	-1.18	0.00232699	0.0149254
P62830	60S ribosomal protein L23	2.34	1.23	0.00230248	0.0151515
Q61234	Alpha-1-syntrophin	1.76	0.82	0.00227463	0.0153846
P62960	Nuclease-sensitive element-binding protein 1	-2.16	-1.11	0.00216516	0.015625
Q61361	Brevican core protein	4.90	2.29	0.00187554	0.015873
P68369	Tubulin alpha-1A chain	2.82	1.49	0.00186768	0.016129
Q8K2Y7	39S ribosomal protein L47, mitochondrial	1.71	0.77	0.00178486	0.0163934
Q8R1S0	Ubiquinone biosynthesis monooxygenase COQ6, mitochondrial	1.99	0.99	0.00176749	0.0166667
Q9QUM9	Proteasome subunit alpha type-6	2.01	1.01	0.00176249	0.0169492
P12970	60S ribosomal protein L7a	1.68	0.75	0.0048189	0.0212766
Q9CQF0	39S ribosomal protein L11, mitochondrial	1.90	0.93	0.00465826	0.0215054
Q9DB72	BTB/POZ domain-containing protein 17	1.63	0.70	0.00463232	0.0217391
P62889	60S ribosomal protein L30	2.13	1.09	0.00436673	0.021978
Q8C129	Leucyl-cystinyl aminopeptidase	-1.88	-0.91	0.00410305	0.0222222
Q80U72	Protein scribble homolog	-3.21	-1.68	0.00406545	0.0224719
O35381	Acidic leucine-rich nuclear phosphoprotein 32 family member A	1.83	0.87	0.00399929	0.0227273
Q9ES97	Reticulon-3	1.62	0.69	0.0037763	0.0229885
P63158	High mobility group protein B1	2.07	1.05	0.00363089	0.0232558
Q3UGY8	Brefeldin A-inhibited guanine nucleotide-exchange protein 3	-1.66	-0.73	0.00593479	0.0283019
Q80UP3	Diacylglycerol kinase zeta	1.83	0.87	0.00583103	0.0285714
Q9EQ20	Methylmalonate-semialdehyde dehydrogenase [acylating], mitochondrial	1.51	0.59	0.00582604	0.0288462
O55126	Protein NipSnap homolog 2	1.53	0.61	0.00561185	0.0291262
Q9QYA2	Mitochondrial import receptor subunit TOM40 homolog	-1.83	-0.87	0.00549262	0.0294118
Q8CIE6	Coatomer subunit alpha	1.57	0.65	0.00537197	0.029703
P02535	Keratin, type I cytoskeletal 10	-2.11	-1.07	0.00519443	0.03
Q9JIF7	Coatomer subunit beta	1.63	0.71	0.00512684	0.030303
P08030	Adenine phosphoribosyltransferase	1.60	0.68	0.00510519	0.0306122
P22315	Ferrochelatase, mitochondrial	2.35	1.23	0.00505283	0.0309278
P54728	UV excision repair protein RAD23 homolog B	-1.81	-0.86	0.00488743	0.03125
Q7TPR4	Alpha-actinin-1	-1.71	-0.78	0.0048634	0.0315789
Q6PER3	Microtubule-associated protein RP/EB family member 3	1.65	0.72	0.00688101	0.0338983
P08228	Superoxide dismutase [Cu-Zn]	-1.64	-0.71	0.00687054	0.034188
P57746	V-type proton ATPase subunit D	-1.46	-0.54	0.0067149	0.0344828
Q8BH24	Transmembrane 9 superfamily member 4	1.69	0.75	0.00659638	0.0347826
Q61584	Fragile X mental retardation syndrome-related protein 1	-1.53	-0.61	0.0065614	0.0350877
O35685	Nuclear migration protein nudC	-1.75	-0.81	0.00652237	0.0353982
Q80TN5	Palmitoyltransferase ZDHHC17	1.95	0.96	0.00638006	0.0357143
P47199	Quinone oxidoreductase	1.46	0.54	0.00636554	0.036036
Q7TN29	Stromal membrane-associated protein 2	-1.89	-0.92	0.00623751	0.0363636
Q9D0F3	Protein ERGIC-53	1.62	0.69	0.00618467	0.0366972
Q9CQZ5	NADH dehydrogenase [ubiquinone] 1 alpha subcomplex subunit 6	1.64	0.71	0.00610804	0.037037
O35954	Membrane-associated phosphatidylinositol transfer protein 1	-1.77	-0.82	0.00600571	0.0373832
Q9DB41	Mitochondrial glutamate carrier 2	1.78	0.83	0.00766802	0.0393701
Q9D7N3	28S ribosomal protein S9, mitochondrial	1.68	0.75	0.00761447	0.0396825
P49813	Tropomodulin-1	-1.95	-0.97	0.007594	0.04
P60202	Myelin proteolipid protein	1.58	0.66	0.00755831	0.0403226
P48962	ADP/ATP translocase 1	1.63	0.70	0.00751333	0.0406504
Q8BR92	Paralemmin-2	-1.54	-0.62	0.00745931	0.0409836
P31648	Sodium- and chloride-dependent GABA transporter 1	-1.83	-0.87	0.00715088	0.0413223
Q9QXS6	Drebrin	-1.60	-0.68	0.00714184	0.0416667
Q8BHG1	Nardilysin	-1.50	-0.59	0.00712375	0.0420168
Q9D0F9	Phosphoglucomutase-1	-1.48	-0.56	0.00786578	0.046875
