# Supplementary material for: Quantitative Changes in the Mitochondrial Proteome of Cerebellar Synaptosomes From Preclinical Cystatin B-Deficient Mice
Source: Front Mol Neurosci. 2020 Nov 13;13:570640. doi: 10.3389/fnmol.2020.570640 (PMC7691638; doi:10.3389/fnmol.2020.570640)
Supplement: Supplementary file 4 [file Table_3.xlsx]

## Sheet: GO CC
Supplementary table 3. Gene Ontology (GO) enrichment analyses for the 128 differentially abundant proteins assessing Cellular component
GO-term	Description	p-value	FDR	Fold enrichment	Reference list (22265)	Input list (127)	ID-numbers (input list)
GO:0005622	intracellular	1.28E-12	5.07E-10	1.46	13691	114	P09405	Q99J47	Q6PER3	Q99LY9	Q9Z0Y1	Q01405	P62075	Q8VEH5	P48962	Q9D7N3	Q8R3Q6	P49813	B9EKR1	P60904	Q7TN29	Q80U72	P47199	Q9ES97	Q80UP3	Q9CXI5	Q9QXS6	O88447	Q80TN5	Q6PEB6	P62889	Q9QUM9	Q922Q8	Q923S9	Q3UGY8	Q5XJY5	P51881	Q9ERG0	P28663	Q9JIF7	Q9CPQ8	Q6PB93	P57746	P42567	Q8R1S0	P58044	Q61937	Q9D0F3	P22315
GO:0005737	cytoplasm	2.23E-20	4.42E-17	1.79	10945	112	P09405	Q99J47	Q6PER3	Q99LY9	Q9Z0Y1	Q01405	P62075	Q8VEH5	P48962	Q9D7N3	Q8R3Q6	P49813	B9EKR1	P60904	Q7TN29	Q80U72	P47199	Q9ES97	Q80UP3	Q9CXI5	Q9QXS6	O88447	Q80TN5	Q6PEB6	P62889	Q9QUM9	Q922Q8	Q923S9	Q3UGY8	Q5XJY5	P51881	Q9ERG0	P28663	Q9JIF7	Q9CPQ8	Q6PB93	P42567	Q8R1S0	P58044	Q61937	Q9D0F3	P22315	Q9D0F9
GO:0005739	mitochondrion	4.09E-17	4.05E-14	4.28	1803	44	P51881	Q91VN4	Q9QYA2	Q8BGT5	P13707	Q8K3J1	Q9CPQ8	Q8BVI4	Q9JLJ2	Q62442	Q99LY9	Q9EQ20	Q8R1S0	Q9D7B6	P58044	P62075	Q8R164	P48962	Q9CQF0	Q9D7N3	P22315	Q8CIM3	P62897	Q8R3Q6	Q9CPP6	P08228	Q9D8T7	Q9CYR0	Q9CQZ5	Q9WUM5	Q8BGD8	Q9D5T0	Q8JZN7	O55126	P14152	Q9DB41	P38060	Q8BHG1	P29758	Q922Q8	Q8K2Y7	P60603	Q99LC3
GO:0005740	mitochondrial envelope	4.20E-11	1.19E-08	5.82	663	22	P51881	Q9CPP6	Q91VN4	Q9QYA2	P08228	Q8K3J1	Q9CPQ8	Q9CQZ5	Q9WUM5	Q99LY9	Q8JZN7	Q8R1S0	O55126	P62075	Q9DB41	P38060	P48962	P22315	P60603	Q99LC3	P56391	P62897
GO:0005743	mitochondrial inner membrane	1.31E-11	4.32E-09	7.60	438	19	P51881	Q9CPP6	Q91VN4	Q9QYA2	Q8K3J1	Q9CPQ8	Q9CQZ5	Q9WUM5	Q99LY9	Q8JZN7	Q8R1S0	P62075	Q9DB41	P38060	P48962	P22315	P60603	Q99LC3	P56391
GO:0005746	mitochondrial respirasome	1.11E-04	3.71E-03	11.24	78	5	Q9CPP6	Q8K3J1	Q9CQZ5	Q99LC3	Q99LY9
GO:0005747	mitochondrial respiratory chain complex I	1.37E-05	6.47E-04	17.89	49	5	Q9CPP6	Q8K3J1	Q9CQZ5	Q99LC3	Q99LY9
GO:0005759	mitochondrial matrix	2.01E-04	6.12E-03	5.16	272	8	P51881	Q9CYR0	Q9WUM5	Q9CQF0	Q9D7N3	P29758	Q922Q8	Q8K2Y7
GO:0005798	Golgi-associated vesicle	2.11E-05	8.89E-04	8.77	140	7	Q8CIE6	Q01405	Q9JIF7	Q80TN5	Q9D0F3	Q5XJY5	P36536
GO:0005829	cytosol	7.14E-08	6.43E-06	2.23	3533	45	Q91VN4	Q9QYA2	P13707	Q62426	Q9ERG0	Q9JIF7	Q8BVI4	Q99KQ4	Q9JLJ2	P12970	P42567	Q9Z0Y1	Q01405	O35685	Q64471	Q61937	Q9D0F9	P62830	P62897	P02088	P08228	Q80U72	P47199	P70195	P54728	Q9WUM5	O08739	Q61584	Q9D892	O35954	Q9QXS6	P62960	Q3TPX4	P57780	P14152	Q9D8E6	O88447	P08030	Q6PEB6	P62889	P01942	Q9QUM9	Q8BNY6
GO:0005840	ribosome	1.35E-06	8.60E-05	7.49	234	10	Q9D8E6	P62889	Q61937	P01942	Q9CQF0	Q9D7N3	P62983	Q8K2Y7	P12970	P62830
GO:0005844	polysome	9.70E-04	2.63E-02	9.61	73	4	P62889	Q9QUM9	P12970	Q61584
GO:0012506	vesicle membrane	5.80E-05	2.13E-03	4.79	366	10	P42567	Q8C129	P60904	Q7TPR4	Q8CIE6	Q01405	Q9JIF7	Q62442	Q5XJY5	P36536
GO:0014069	postsynaptic density	1.09E-04	3.73E-03	4.43	396	10	P42669	Q9QXS6	Q80U72	Q9D8E6	Q9D0M5	P62889	Q80UP3	P62830	Q61584	B9EKR1
GO:0015934	large ribosomal subunit	1.27E-05	6.46E-04	9.51	129	7	Q9D8E6	P62889	Q61937	Q9CQF0	Q8K2Y7	P12970	P62830
GO:0015935	small ribosomal subunit	1.23E-03	3.20E-02	8.99	78	4	Q61937	P01942	Q9D7N3	P62983
GO:0019866	organelle inner membrane	6.32E-11	1.39E-08	6.91	482	19	P51881	Q9CPP6	Q91VN4	Q9QYA2	Q8K3J1	Q9CPQ8	Q9CQZ5	Q9WUM5	Q99LY9	Q8JZN7	Q8R1S0	P62075	Q9DB41	P38060	P48962	P22315	P60603	Q99LC3	P56391
GO:0022625	cytosolic large ribosomal subunit	7.54E-04	2.10E-02	10.31	68	4	Q9D8E6	P62889	P12970	P62830
GO:0022626	cytosolic ribosome	7.31E-05	2.58E-03	8.99	117	6	Q9D8E6	P62889	P01942	P62983	P12970	P62830
GO:0030016	myofibril	3.53E-05	1.37E-03	6.68	210	8	Q7TPR4	P57780	Q9D8E6	Q9QUM9	Q9D0F3	Q9D0F9	Q61584	P49813
GO:0030017	sarcomere	1.22E-04	3.91E-03	6.56	187	7	Q7TPR4	P57780	Q9D8E6	Q9QUM9	Q9D0F3	Q9D0F9	P49813
GO:0030054	cell junction	3.37E-07	2.57E-05	2.68	2028	31	Q9ERG0	Q7TPR4	P28663	Q8BYI9	Q9D0M5	Q99KQ4	Q62442	P12970	Q61234	P42567	P42669	P62830	B9EKR1	P60904	Q80U72	P31648	Q9ES97	Q61361	Q80UP3	Q61584	Q9D5T0	Q62059	Q9DB05	P68369	Q9QXS6	P57780	Q9D8E6	Q80TN5	Q6PEB6	P62889	Q8BNY6
GO:0030117	membrane coat	2.41E-05	9.95E-04	11.07	95	6	P42567	Q8CIE6	Q01405	Q9JIF7	Q5XJY5	P36536
GO:0030120	vesicle coat	1.04E-06	6.88E-05	19.85	53	6	P42567	Q8CIE6	Q01405	Q9JIF7	Q5XJY5	P36536
GO:0030126	COPI vesicle coat	7.71E-05	2.68E-03	43.83	12	3	Q8CIE6	Q9JIF7	Q5XJY5
GO:0030135	coated vesicle	1.26E-04	3.97E-03	6.53	188	7	P42567	Q8CIE6	Q01405	Q9JIF7	Q9D0F3	Q5XJY5	P36536
GO:0030137	COPI-coated vesicle	8.58E-04	2.36E-02	17.53	30	3	Q8CIE6	Q9JIF7	Q5XJY5
GO:0030659	cytoplasmic vesicle membrane	3.17E-05	1.26E-03	5.16	340	10	P42567	Q8C129	P60904	Q7TPR4	Q8CIE6	Q01405	Q9JIF7	Q62442	Q5XJY5	P36536
GO:0030660	Golgi-associated vesicle membrane	2.43E-06	1.50E-04	16.97	62	6	Q8CIE6	Q01405	Q9JIF7	Q80TN5	Q5XJY5	P36536
GO:0030662	coated vesicle membrane	7.28E-06	4.00E-04	13.84	76	6	P42567	Q8CIE6	Q01405	Q9JIF7	Q5XJY5	P36536
GO:0030663	COPI-coated vesicle membrane	1.89E-04	5.86E-03	30.94	17	3	Q8CIE6	Q9JIF7	Q5XJY5
GO:0030964	NADH dehydrogenase complex	1.37E-05	6.63E-04	17.89	49	5	Q9CPP6	Q8K3J1	Q9CQZ5	Q99LC3	Q99LY9
GO:0031045	dense core granule	1.02E-03	2.73E-02	16.44	32	3	P08228	Q7TPR4	Q8BNY6
GO:0031090	organelle membrane	1.13E-10	2.23E-08	3.15	2118	38	P51881	Q91VN4	Q9QYA2	Q7TPR4	P28663	Q8K3J1	Q9JIF7	Q9CPQ8	Q62442	Q99LY9	P42567	Q8R1S0	Q8CIE6	Q01405	P62075	Q8VEH5	Q5FWK3	Q9D0F3	P48962	P22315	Q9CPP6	P60904	Q9ES97	Q9CQZ5	Q9WUM5	P36536	Q8C129	Q8JZN7	Q9DB05	P62960	O55126	Q80TN5	Q9DB41	P38060	P60603	Q99LC3	P56391	Q5XJY5
GO:0031966	mitochondrial membrane	5.28E-10	8.72E-08	5.68	617	20	P51881	Q9CPP6	Q91VN4	Q9QYA2	Q8K3J1	Q9CPQ8	Q9CQZ5	Q9WUM5	Q99LY9	Q8JZN7	Q8R1S0	O55126	P62075	Q9DB41	P38060	P48962	P22315	P60603	Q99LC3	P56391
GO:0031967	organelle envelope	4.71E-08	4.91E-06	3.77	1069	23	P51881	Q9CPP6	Q91VN4	Q9QYA2	P08228	Q8K3J1	Q9CPQ8	Q9CQZ5	Q9WUM5	Q99LY9	Q8JZN7	Q8R1S0	P62960	O55126	P62075	Q9DB41	P38060	P48962	P22315	P60603	Q99LC3	P56391	P62897
GO:0031975	envelope	4.79E-08	4.74E-06	3.77	1070	23	P51881	Q9CPP6	Q91VN4	Q9QYA2	P08228	Q8K3J1	Q9CPQ8	Q9CQZ5	Q9WUM5	Q99LY9	Q8JZN7	Q8R1S0	P62960	O55126	P62075	Q9DB41	P38060	P48962	P22315	P60603	Q99LC3	P56391	P62897
GO:0032279	asymmetric synapse	1.18E-04	3.84E-03	4.38	400	10	P42669	Q9QXS6	Q80U72	Q9D8E6	Q9D0M5	P62889	Q80UP3	P62830	Q61584	B9EKR1
GO:0032991	protein-containing complex	4.97E-06	2.82E-04	1.78	5309	54	P13707	P09405	Q8K3J1	Q9D0M5	Q62442	P12970	Q99LY9	Q61234	Q8CIE6	P42669	Q9Z0Y1	Q01405	P62075	Q9D7N3	P62830	P49813	P02088	Q80U72	Q9D8T7	P36536	P62960	P57780	O88447	P62889	P01942	Q9QUM9	Q99LC3	Q5XJY5	P51881	Q91VN4	Q9QYA2	P28663	Q9JIF7	Q9CPQ8	P57746	P42567	Q61937	Q9CQF0	Q9CPP6	P08228	P70195	Q64010	P54728
GO:0035770	ribonucleoprotein granule	1.73E-03	4.35E-02	4.85	217	6	O35954	P68369	P09405	P62960	Q9QUM9	Q61584
GO:0036464	cytoplasmic ribonucleoprotein granule	1.34E-03	3.45E-02	5.11	206	6	O35954	P68369	P09405	P62960	Q9QUM9	Q61584
GO:0042995	cell projection	1.04E-03	2.75E-02	1.89	2499	27	Q9ERG0	Q7TPR4	Q8BVI4	Q62442	P57746	P42567	Q8R1S0	Q8CIE6	P42669	Q5FWK3	B9EKR1	P08228	Q80U72	Q9D8T7	P31648	Q61361	Q80UP3	Q61584	Q62059	P63158	Q9QXS6	P62960	P57780	O88447	Q80TN5	Q6PEB6	Q8BNY6
GO:0043209	myelin sheath	4.56E-11	1.13E-08	11.52	213	14	P51881	P02088	P08228	P28663	Q80U72	Q9DB05	P68369	P14152	P60202	P01942	P48962	P62983	Q99LC3	P62897
GO:0043226	organelle	2.61E-13	1.29E-10	1.55	12303	109	P09405	Q99J47	Q6PER3	Q99LY9	Q9Z0Y1	Q01405	P62075	Q8VEH5	P48962	Q9D7N3	Q8R3Q6	P49813	B9EKR1	P60904	Q80U72	Q9ES97	Q80UP3	Q9CXI5	Q9QXS6	O88447	Q80TN5	Q6PEB6	P62889	Q9QUM9	Q922Q8	Q923S9	Q3UGY8	Q5XJY5	P51881	Q9ERG0	P28663	Q9JIF7	Q9CPQ8	Q6PB93	P57746	P42567	Q8R1S0	P58044	Q61937	Q9D0F3	P22315	Q9D0F9	P62897
GO:0043227	membrane-bounded organelle	3.02E-10	5.43E-08	1.56	11048	98	P09405	Q99J47	Q99LY9	Q9Z0Y1	Q01405	P62075	Q8VEH5	P48962	Q9D7N3	Q8R3Q6	P49813	P60904	Q80U72	Q9ES97	Q80UP3	Q9CXI5	O88447	Q80TN5	Q6PEB6	P62889	Q9QUM9	Q922Q8	Q923S9	Q3UGY8	Q5XJY5	P51881	P28663	Q9JIF7	Q9CPQ8	Q6PB93	P42567	Q8R1S0	P58044	Q61937	Q9D0F3	P22315	P62897	Q9CPP6	Q9CYR0	Q9CQZ5	Q9WUM5	Q8BGD8	O35381
GO:0043228	non-membrane-bounded organelle	5.74E-04	1.67E-02	1.68	4181	40	P51881	Q62426	Q9ERG0	P09405	Q7TPR4	Q9D0M5	P12970	Q6PER3	P57746	Q61234	P42669	Q9Z0Y1	O35685	P62075	Q61937	Q9D0F3	Q9CQF0	Q9D7N3	Q9D0F9	P62830	P49813	Q9CYR0	Q64010	Q61584	O35954	P68369	P63158	Q9QXS6	P62960	P57780	Q9D8E6	O88447	P62889	P01942	Q9QUM9	P02535	P62983	Q922Q8	Q8K2Y7	Q7TNV0
GO:0043229	intracellular organelle	1.27E-13	8.37E-11	1.58	11954	108	P09405	Q99J47	Q6PER3	Q99LY9	Q9Z0Y1	Q01405	P62075	Q8VEH5	P48962	Q9D7N3	Q8R3Q6	P49813	P60904	Q80U72	Q9ES97	Q80UP3	Q9CXI5	Q9QXS6	O88447	Q80TN5	Q6PEB6	P62889	Q9QUM9	Q922Q8	Q923S9	Q3UGY8	Q5XJY5	P51881	Q9ERG0	P28663	Q9JIF7	Q9CPQ8	Q6PB93	P57746	P42567	Q8R1S0	P58044	Q61937	Q9D0F3	P22315	Q9D0F9	P62897	Q9CPP6
GO:0043231	intracellular membrane-bounded organelle	3.07E-09	4.34E-07	1.57	10291	92	Q8BGT5	P13707	P09405	Q8K3J1	Q99J47	Q8BVI4	Q9JLJ2	Q62442	P12970	Q99LY9	Q9EQ20	Q8CIE6	P42669	Q9Z0Y1	Q01405	Q9D7B6	O35685	P62075	Q8VEH5	Q64471	P48962	Q9D7N3	P62830	Q8CIM3	Q8R3Q6	P49813	Q80U72	Q9D8T7	Q9ES97	Q80UP3	P36536	O35954	Q9CXI5	P62960	P57780	Q80TN5	Q6PEB6	P62889	Q9QUM9	Q8BNY6	Q922Q8	Q923S9	Q99LC3
GO:0043232	intracellular non-membrane-bounded organelle	5.49E-04	1.62E-02	1.68	4162	40	P51881	Q62426	Q9ERG0	P09405	Q7TPR4	Q9D0M5	P12970	Q6PER3	P57746	Q61234	P42669	Q9Z0Y1	O35685	P62075	Q61937	Q9D0F3	Q9CQF0	Q9D7N3	Q9D0F9	P62830	P49813	Q9CYR0	Q64010	Q61584	O35954	P68369	P63158	Q9QXS6	P62960	P57780	Q9D8E6	O88447	P62889	P01942	Q9QUM9	P02535	P62983	Q922Q8	Q8K2Y7	Q7TNV0
GO:0043292	contractile fiber	7.49E-06	4.01E-04	7.04	224	9	Q7TPR4	P57780	Q9D8E6	Q9QUM9	Q9D0F3	Q7TNV0	Q9D0F9	Q61584	P49813
GO:0044391	ribosomal subunit	3.73E-07	2.74E-05	8.68	202	10	Q9D8E6	P62889	Q61937	P01942	Q9CQF0	Q9D7N3	P62983	Q8K2Y7	P12970	P62830
GO:0045202	synapse	1.00E-08	1.10E-06	3.42	1435	28	Q7TPR4	P28663	Q8BYI9	Q9D0M5	Q62442	P12970	Q61234	P42567	P42669	P62830	B9EKR1	P60904	Q80U72	P31648	Q9ES97	Q61361	Q80UP3	Q61584	Q9D5T0	Q62059	Q9DB05	P68369	Q9QXS6	Q9D8E6	Q80TN5	Q6PEB6	P62889	Q8BNY6
GO:0045271	respiratory chain complex I	1.37E-05	6.80E-04	17.89	49	5	Q9CPP6	Q8K3J1	Q9CQZ5	Q99LC3	Q99LY9
GO:0048471	perinuclear region of cytoplasm	1.15E-04	3.78E-03	3.47	657	13	Q9D8T7	Q6PB93	O35381	Q6PER3	Q61584	Q8C129	Q9QXS6	Q9Z0Y1	Q01405	P62960	P57780	Q6PEB6	Q5FWK3
GO:0048475	coated membrane	2.41E-05	9.75E-04	11.07	95	6	P42567	Q8CIE6	Q01405	Q9JIF7	Q5XJY5	P36536
GO:0062023	collagen-containing extracellular matrix	1.34E-03	3.41E-02	3.83	366	8	Q62426	Q8BYI9	O89029	Q61361	Q9D0F3	Q80YX1	B9EKR1	Q62059
GO:0070044	synaptobrevin 2-SNAP-25-syntaxin-1a complex	6.58E-04	1.86E-02	70.13	5	2	Q9DB05	P28663
GO:0070469	respirasome	1.81E-05	7.95E-04	11.69	90	6	Q9CPP6	Q8K3J1	Q9CQZ5	Q99LC3	P56391	Q99LY9
GO:0072534	perineuronal net	2.02E-07	1.67E-05	> 100	6	4	Q8BYI9	Q61361	B9EKR1	Q62059
GO:0098588	bounding membrane of organelle	5.94E-05	2.14E-03	2.87	1098	18	P60904	Q9QYA2	Q7TPR4	P28663	Q9JIF7	Q62442	P36536	P42567	Q8JZN7	Q9DB05	Q8CIE6	Q01405	O55126	Q80TN5	Q5FWK3	Q9D0F3	P48962	Q5XJY5
GO:0098794	postsynapse	2.23E-07	1.76E-05	4.34	727	18	Q7TPR4	P28663	Q80U72	P31648	Q9D0M5	Q80UP3	Q61584	Q9D5T0	Q61234	Q9DB05	P42669	Q9QXS6	Q9D8E6	Q6PEB6	P62889	Q8BNY6	P62830	B9EKR1
GO:0098796	membrane protein complex	4.99E-07	3.53E-05	3.42	1128	22	Q9CPP6	Q91VN4	Q9QYA2	P28663	Q80U72	Q8K3J1	Q9JIF7	Q9CPQ8	Q9CQZ5	Q62442	Q99LY9	P36536	P57746	Q61234	P42567	Q9DB05	Q8CIE6	Q01405	P60603	Q99LC3	P56391	Q5XJY5
GO:0098798	mitochondrial protein complex	5.46E-10	8.33E-08	9.44	260	14	Q9CPP6	Q91VN4	Q9QYA2	Q8K3J1	Q9CPQ8	Q9CQZ5	Q9WUM5	Q99LY9	P62075	Q9CQF0	Q9D7N3	Q8K2Y7	P60603	Q99LC3
GO:0098800	inner mitochondrial membrane protein complex	9.83E-07	6.71E-05	11.13	126	8	Q9CPP6	Q91VN4	Q8K3J1	Q9CPQ8	Q9CQZ5	P60603	Q99LC3	Q99LY9
GO:0098803	respiratory chain complex	9.59E-06	5.00E-04	13.15	80	6	Q9CPP6	Q8K3J1	Q9CQZ5	Q99LC3	P56391	Q99LY9
GO:0098805	whole membrane	2.69E-06	1.62E-04	3.20	1152	21	P51881	P60904	Q9QYA2	Q7TPR4	P28663	Q8BYI9	Q9JIF7	Q64010	Q62442	P36536	P42567	Q8JZN7	Q9DB05	P68369	Q8CIE6	Q01405	O55126	Q80TN5	Q5FWK3	P48962	Q5XJY5
GO:0098966	perisynaptic extracellular matrix	4.16E-09	5.49E-07	> 100	7	5	Q8BYI9	Q61361	Q80YX1	B9EKR1	Q62059
GO:0098978	glutamatergic synapse	4.82E-08	4.55E-06	5.52	508	16	Q7TPR4	P28663	Q80U72	Q8BYI9	Q9D0M5	Q61361	Q80UP3	Q62442	Q61584	Q9D5T0	P42567	Q9DB05	P42669	Q9QXS6	Q8BNY6	B9EKR1
GO:0098984	neuron to neuron synapse	4.12E-05	1.57E-03	4.52	427	11	P42669	Q9QXS6	Q80U72	Q8BYI9	Q9D8E6	Q9D0M5	P62889	Q80UP3	P62830	Q61584	B9EKR1
GO:0099080	supramolecular complex	1.69E-05	7.77E-04	2.93	1197	20	P09405	Q7TPR4	Q9D0M5	Q6PER3	Q61584	O35954	P68369	Q9QXS6	Q9Z0Y1	P62960	O35685	P57780	Q9D8E6	O88447	Q9QUM9	Q9D0F3	P02535	Q7TNV0	Q9D0F9	P49813
GO:0099081	supramolecular polymer	1.94E-05	8.35E-04	3.28	909	17	Q7TPR4	Q9D0M5	Q6PER3	Q61584	P68369	Q9QXS6	Q9Z0Y1	O35685	P57780	Q9D8E6	O88447	Q9QUM9	Q9D0F3	P02535	Q7TNV0	Q9D0F9	P49813
GO:0099512	supramolecular fiber	1.76E-05	7.93E-04	3.30	902	17	Q7TPR4	Q9D0M5	Q6PER3	Q61584	P68369	Q9QXS6	Q9Z0Y1	O35685	P57780	Q9D8E6	O88447	Q9QUM9	Q9D0F3	P02535	Q7TNV0	Q9D0F9	P49813
GO:0099535	synapse-associated extracellular matrix	6.73E-09	7.84E-07	> 100	8	5	Q8BYI9	Q61361	Q80YX1	B9EKR1	Q62059
GO:0099544	perisynaptic space	6.73E-09	8.33E-07	> 100	8	5	Q8BYI9	Q61361	Q80YX1	B9EKR1	Q62059
GO:0099572	postsynaptic specialization	2.29E-04	6.89E-03	4.03	435	10	P42669	Q9QXS6	Q80U72	Q9D8E6	Q9D0M5	P62889	Q80UP3	P62830	Q61584	B9EKR1
GO:0110165	cellular anatomical entity	8.80E-08	7.58E-06	1.18	18638	125	P09405	Q99J47	Q6PER3	Q99LY9	Q9Z0Y1	Q01405	P62075	Q8VEH5	O89029	P48962	Q9D7N3	Q8R3Q6	P49813	B9EKR1	P60904	Q7TN29	Q80U72	P47199	Q9ES97	Q9ET30	Q80UP3	Q80YX1	Q9CXI5	Q9QXS6	O88447	Q80TN5	Q6PEB6	P62889	Q9QUM9	Q922Q8	Q923S9	Q3UGY8	Q5XJY5	P51881	Q9ERG0	P28663	Q8BYI9	Q9JIF7	Q9CPQ8	Q6PB93	P57746	P42567	Q8R1S0
GO:1902737	dendritic filopodium	6.58E-04	1.89E-02	70.13	5	2	Q9QXS6	Q61584
GO:1990204	oxidoreductase complex	5.02E-05	1.88E-03	9.65	109	6	Q9CPP6	P13707	Q8K3J1	Q9CQZ5	Q99LC3	Q99LY9
GO:1990904	ribonucleoprotein complex	3.21E-06	1.87E-04	3.99	703	16	P09405	Q9D8T7	P12970	Q61584	P62960	P57780	Q9D8E6	P62889	Q61937	P01942	Q9QUM9	Q9CQF0	Q9D7N3	P62983	Q8K2Y7	P62830
[truncated: 82 more columns]

## Sheet: GO BP
Supplementary table 3. Gene Ontology (GO) enrichment analyses for the 128 differentially abundant proteins assessing Biological process
GO-term	Description	p-value	FDR	Fold enrichment	Reference list (22265)	Input list (127)	ID-numbers (input list)
GO:0009987	cellular process	6.94e-07	0.00122	1.32	14059	106	P09405	Q99J47	Q6PER3	Q99LY9	Q9Z0Y1	Q01405	P62075	O89029	P48962	Q9D7N3	P49813	B9EKR1	P60904	Q80U72	P47199	Q9ES97	Q80UP3	Q80YX1	Q9CXI5	Q9QXS6	O88447	Q80TN5	P62889	Q9QUM9	Q923S9	Q3UGY8	P51881	Q9ERG0	P28663	Q8BYI9	Q9CPQ8	Q6PB93	P57746	P42567	Q8R1S0	P58044	Q61937	Q9D0F3	P22315	Q9D0F9	P62897	Q9CPP6	Q9CYR0
GO:0071840	cellular component organization or biogenesis	3.01e-10	2.38e-06	2.11	5239	63	Q8K3J1	Q9JLJ2	Q62442	P12970	Q6PER3	Q99LY9	Q61234	P42669	Q01405	P62075	O89029	P48962	P62830	P49813	B9EKR1	Q80U72	Q9D8T7	P47199	Q9ES97	Q61361	Q80UP3	Q80YX1	P36536	Q9CXI5	Q9QXS6	P57780	O88447	Q923S9	Q99LC3	Q3UGY8	P51881	Q91VN4	Q9QYA2	Q9ERG0	Q7TPR4	P28663	Q8BYI9	P57746	P42567	Q61937	Q9D0F3	Q9CQF0	P22315
GO:0016043	cellular component organization	1.58e-10	2.5e-06	2.15	5045	62	Q8K3J1	Q9JLJ2	Q62442	Q6PER3	Q99LY9	Q61234	P42669	Q01405	P62075	O89029	P48962	P62830	P49813	B9EKR1	Q80U72	Q9D8T7	P47199	Q9ES97	Q61361	Q80UP3	Q80YX1	P36536	Q9CXI5	Q9QXS6	P57780	O88447	Q923S9	Q99LC3	Q3UGY8	P51881	Q91VN4	Q9QYA2	Q9ERG0	Q7TPR4	P28663	Q8BYI9	P57746	P42567	Q61937	Q9D0F3	Q9CQF0	P22315	Q9CPP6
GO:0051179	localization	5.39e-05	0.023	1.73	4864	48	P51881	Q9QYA2	Q9ERG0	P09405	P28663	Q8BYI9	Q9JIF7	Q9CPQ8	Q62442	Q6PER3	P57746	P42567	Q8CIE6	P42669	Q01405	O35685	P62075	Q61937	Q5FWK3	Q9D0F3	P48962	P02088	P08228	Q8BH24	Q80U72	Q9D8T7	P31648	Q9ES97	Q9ET30	Q64010	O35381	P36536	Q62059	Q8JZN7	Q9DB05	O35954	P63158	Q9QXS6	P62960	Q3TPX4	P57780	O88447	Q80TN5
GO:0006996	organelle organization	2.44e-09	9.65e-06	2.53	3054	44	P51881	Q91VN4	Q9QYA2	Q9ERG0	Q7TPR4	Q8K3J1	Q62442	Q6PER3	Q99LY9	P57746	P42669	Q01405	P62075	Q61937	Q9D0F3	P48962	Q9CQF0	P49813	Q9CPP6	P08228	Q9D8T7	Q9CYR0	Q9ES97	Q64010	P54728	Q9CQZ5	Q80UP3	P36536	Q9D892	Q8JZN7	P68369	P63158	Q9QXS6	O55126	Q3TPX4	P57780	O88447	P38060	P02535	Q7TNV0	P60603	Q923S9	Q99LC3
GO:0006810	transport	1.57e-05	0.00886	1.96	3572	40	P51881	Q9QYA2	Q9ERG0	P09405	P28663	Q9JIF7	Q9CPQ8	Q62442	P57746	P42567	Q8CIE6	P42669	Q01405	O35685	P62075	Q61937	Q5FWK3	Q9D0F3	P48962	P02088	P08228	Q8BH24	Q80U72	P31648	Q9ES97	O35381	P36536	Q8JZN7	Q9DB05	O35954	P62960	Q3TPX4	P57780	O88447	Q80TN5	P08030	Q9DB41	P60603	Q923S9	Q5XJY5
GO:0051234	establishment of localization	3.85e-05	0.0179	1.89	3711	40	P51881	Q9QYA2	Q9ERG0	P09405	P28663	Q9JIF7	Q9CPQ8	Q62442	P57746	P42567	Q8CIE6	P42669	Q01405	O35685	P62075	Q61937	Q5FWK3	Q9D0F3	P48962	P02088	P08228	Q8BH24	Q80U72	P31648	Q9ES97	O35381	P36536	Q8JZN7	Q9DB05	O35954	P62960	Q3TPX4	P57780	O88447	Q80TN5	P08030	Q9DB41	P60603	Q923S9	Q5XJY5
GO:0051641	cellular localization	4.39e-07	0.000868	2.65	2053	31	Q9QYA2	P28663	Q9JIF7	Q9CPQ8	Q6PER3	P57746	P42567	Q8CIE6	P42669	Q01405	O35685	P62075	Q61937	Q5FWK3	Q9D0F3	P08228	Q8BH24	Q80U72	Q9ET30	O35381	P36536	Q8JZN7	Q9DB05	Q9QXS6	P62960	Q3TPX4	P57780	O88447	P60603	Q923S9	Q5XJY5
GO:0009058	biosynthetic process	1.31e-06	0.00188	2.51	2161	31	Q8BGT5	P13707	Q9CPQ8	Q6PB93	Q99J47	Q8BVI4	Q99KQ4	Q9JLJ2	Q8R1S0	P42669	P58044	Q61937	Q9CQF0	Q9D7N3	P22315	Q9D0F9	P62830	P08228	Q9CYR0	Q9WUM5	Q80UP3	O08739	Q9D892	Q9D8E6	Q80TN5	P08030	P62889	P38060	P60202	P62983	Q8K2Y7
GO:0044249	cellular biosynthetic process	2.19e-06	0.00231	2.56	1985	29	Q9CPQ8	Q6PB93	Q99J47	Q8BVI4	Q99KQ4	Q9JLJ2	Q8R1S0	P42669	P58044	Q61937	Q9CQF0	Q9D7N3	P22315	Q9D0F9	P62830	P08228	Q9CYR0	Q9WUM5	Q80UP3	O08739	Q9D892	Q9D8E6	Q80TN5	P08030	P62889	P38060	P60202	P62983	Q8K2Y7
GO:0033036	macromolecule localization	4.36e-05	0.0191	2.24	2266	29	Q9QYA2	Q9ERG0	P28663	Q9JIF7	Q6PER3	P57746	P42567	Q8CIE6	P42669	Q01405	P62075	Q61937	Q5FWK3	Q9D0F3	Q8BH24	Q80U72	Q9ET30	P36536	Q9DB05	O35954	Q9QXS6	P62960	Q3TPX4	P57780	O88447	Q80TN5	P60603	Q923S9	Q5XJY5
GO:0071702	organic substance transport	1.86e-06	0.00244	2.64	1856	28	P51881	Q9QYA2	Q9ERG0	P28663	Q9JIF7	P42567	Q8CIE6	P42669	Q01405	P62075	Q61937	Q5FWK3	Q9D0F3	P48962	Q80U72	P31648	P36536	Q9DB05	O35954	P62960	Q3TPX4	P57780	O88447	Q80TN5	Q9DB41	P60603	Q923S9	Q5XJY5
GO:0008104	protein localization	5.39e-06	0.00426	2.5	1963	28	Q9QYA2	P28663	Q9JIF7	Q6PER3	P57746	P42567	Q8CIE6	P42669	Q01405	P62075	Q61937	Q5FWK3	Q9D0F3	Q8BH24	Q80U72	Q9ET30	P36536	Q9DB05	O35954	Q9QXS6	P62960	Q3TPX4	P57780	O88447	Q80TN5	P60603	Q923S9	Q5XJY5
GO:1901576	organic substance biosynthetic process	1.9e-05	0.01	2.36	2079	28	P13707	Q9CPQ8	Q6PB93	Q99J47	Q8BVI4	Q99KQ4	Q8R1S0	P42669	P58044	Q61937	Q9CQF0	Q9D7N3	P22315	Q9D0F9	P62830	Q9CYR0	Q9WUM5	Q80UP3	O08739	Q9D892	Q9D8E6	Q80TN5	P08030	P62889	P38060	P60202	P62983	Q8K2Y7
GO:0071705	nitrogen compound transport	1.89e-07	0.000427	3.05	1550	27	P51881	Q9QYA2	P28663	Q9JIF7	P42567	Q8CIE6	P42669	Q01405	P62075	Q61937	Q5FWK3	Q9D0F3	P48962	Q80U72	P31648	P36536	Q9DB05	O35954	P62960	Q3TPX4	P57780	O88447	Q80TN5	Q9DB41	P60603	Q923S9	Q5XJY5
GO:0046907	intracellular transport	6.67e-08	0.000211	3.56	1182	24	Q9QYA2	P08228	P28663	Q80U72	Q9JIF7	Q9CPQ8	O35381	P36536	P42567	Q8JZN7	Q9DB05	Q8CIE6	P42669	Q01405	O35685	P57780	O88447	P62075	Q61937	Q5FWK3	Q9D0F3	P60603	Q923S9	Q5XJY5
GO:0015031	protein transport	2.51e-06	0.00248	3.1	1246	22	Q9QYA2	P28663	Q80U72	Q9JIF7	P36536	P42567	Q9DB05	O35954	Q8CIE6	P42669	Q01405	Q3TPX4	P57780	O88447	P62075	Q80TN5	Q61937	Q5FWK3	Q9D0F3	P60603	Q923S9	Q5XJY5
GO:0015833	peptide transport	3.67e-06	0.00322	3.02	1276	22	Q9QYA2	P28663	Q80U72	Q9JIF7	P36536	P42567	Q9DB05	O35954	Q8CIE6	P42669	Q01405	Q3TPX4	P57780	O88447	P62075	Q80TN5	Q61937	Q5FWK3	Q9D0F3	P60603	Q923S9	Q5XJY5
GO:0042886	amide transport	4.98e-06	0.00414	2.96	1301	22	Q9QYA2	P28663	Q80U72	Q9JIF7	P36536	P42567	Q9DB05	O35954	Q8CIE6	P42669	Q01405	Q3TPX4	P57780	O88447	P62075	Q80TN5	Q61937	Q5FWK3	Q9D0F3	P60603	Q923S9	Q5XJY5
GO:0045184	establishment of protein localization	7.03e-06	0.00529	2.9	1330	22	Q9QYA2	P28663	Q80U72	Q9JIF7	P36536	P42567	Q9DB05	O35954	Q8CIE6	P42669	Q01405	Q3TPX4	P57780	O88447	P62075	Q80TN5	Q61937	Q5FWK3	Q9D0F3	P60603	Q923S9	Q5XJY5
GO:0034613	cellular protein localization	1.98e-05	0.0101	2.71	1423	22	Q9QYA2	P28663	Q8BH24	Q80U72	Q9JIF7	Q9ET30	Q6PER3	P36536	P57746	P42567	Q9DB05	Q8CIE6	P42669	Q9QXS6	Q01405	P62960	Q3TPX4	O88447	P62075	Q61937	P60603	Q923S9
GO:0070727	cellular macromolecule localization	2.14e-05	0.0106	2.7	1430	22	Q9QYA2	P28663	Q8BH24	Q80U72	Q9JIF7	Q9ET30	Q6PER3	P36536	P57746	P42567	Q9DB05	Q8CIE6	P42669	Q9QXS6	Q01405	P62960	Q3TPX4	O88447	P62075	Q61937	P60603	Q923S9
GO:0055114	oxidation-reduction process	3.07e-06	0.00285	3.79	787	17	Q9CPP6	P13707	P08228	Q8K3J1	Q9CQZ5	Q99J47	Q9WUM5	Q8BVI4	Q9JLJ2	Q99LY9	Q9D7B6	P14152	Q9DB41	Q9D0F9	Q99LC3	Q8CIM3	P62897
GO:0007005	mitochondrion organization	1.53e-09	8.05e-06	7.12	394	16	P51881	Q9CPP6	Q91VN4	Q9QYA2	Q9D8T7	Q8K3J1	Q9CYR0	Q9CQZ5	Q99LY9	Q8JZN7	O55126	P62075	P38060	P48962	P60603	Q99LC3
GO:0006886	intracellular protein transport	0.000138	0.0497	3.21	765	14	Q9QYA2	P28663	Q80U72	Q9JIF7	P36536	Q9DB05	Q8CIE6	P42669	Q01405	O88447	P62075	Q61937	P60603	Q923S9
GO:0043603	cellular amide metabolic process	0.000129	0.0473	3.43	665	13	P08228	Q9WUM5	Q8C129	Q9D8E6	Q64471	P62889	P38060	Q9CQF0	Q9D7N3	Q8BHG1	P62983	Q8K2Y7	P62830
GO:0006091	generation of precursor metabolites and energy	1.36e-07	0.000359	7.36	286	12	Q9CPP6	P13707	O55126	P14152	Q8K3J1	Q9CPQ8	Q9DB41	P38060	Q9WUM5	Q9D0F9	Q99LC3	P62897
GO:0051186	cofactor metabolic process	1.09e-05	0.00662	5.24	368	11	Q8R1S0	P02088	P08228	Q64471	P38060	P01942	Q9WUM5	Q8BVI4	Q99KQ4	P22315	P62897
GO:0006518	peptide metabolic process	6.27e-05	0.0261	4.3	448	11	Q8C129	P08228	Q9D8E6	Q64471	P62889	Q9CQF0	Q9D7N3	Q8BHG1	P62983	Q8K2Y7	P62830
GO:0015980	energy derivation by oxidation of organic compounds	2.16e-06	0.00244	8.26	191	9	Q9CPP6	P13707	P14152	Q8K3J1	Q9DB41	Q9WUM5	Q9D0F9	Q99LC3	P62897
GO:0007165	signal transduction	1.79e-05	0.00973	0.33	4827	9	Q8C129	Q8JZN7	P57780	Q64010	Q5FWK3	P60202	Q80UP3	Q8BNY6	Q923S9
GO:0045333	cellular respiration	1.16e-06	0.00184	10.87	129	8	Q9CPP6	P13707	P14152	Q8K3J1	Q9DB41	Q9WUM5	Q99LC3	P62897
GO:0006839	mitochondrial transport	1.26e-05	0.0074	7.75	181	8	P51881	Q8JZN7	Q9QYA2	P62075	Q9CPQ8	Q9DB41	P48962	P60603
GO:0048193	Golgi vesicle transport	0.000115	0.0453	5.61	250	8	P42567	Q8CIE6	Q01405	Q3TPX4	Q9JIF7	Q9D0F3	Q5XJY5	P36536
GO:0007006	mitochondrial membrane organization	2.15e-06	0.00262	12.65	97	7	P51881	Q8JZN7	Q91VN4	Q9QYA2	P62075	P48962	P60603
GO:0022904	respiratory electron transport chain	7.28e-06	0.00523	13.84	76	6	Q9CPP6	P13707	Q8K3J1	Q9DB41	Q99LC3	P62897
GO:0022900	electron transport chain	8.96e-06	0.00616	13.32	79	6	Q9CPP6	P13707	Q8K3J1	Q9DB41	Q99LC3	P62897
GO:0006888	endoplasmic reticulum to Golgi vesicle-mediated transport	4.11e-05	0.0186	10.02	105	6	Q8CIE6	Q01405	Q9JIF7	Q9D0F3	Q5XJY5	P36536
GO:0032981	mitochondrial respiratory chain complex I assembly	1.03e-05	0.00653	19.06	46	5	Q9CPP6	Q8K3J1	Q9CQZ5	Q99LC3	Q99LY9
GO:0010257	NADH dehydrogenase complex assembly	1.03e-05	0.00681	19.06	46	5	Q9CPP6	Q8K3J1	Q9CQZ5	Q99LC3	Q99LY9
GO:0043462	regulation of ATPase activity	3.67e-05	0.0176	14.37	61	5	Q9DB05	P28663	Q9QXS6	Q9CYR0	Q9D0M5
GO:0006119	oxidative phosphorylation	8.74e-05	0.0354	11.85	74	5	O55126	Q8K3J1	Q9CPQ8	Q99LC3	P62897
GO:0033108	mitochondrial respiratory chain complex assembly	0.000124	0.0466	10.96	80	5	Q9CPP6	Q8K3J1	Q9CQZ5	Q99LC3	Q99LY9
GO:0042743	hydrogen peroxide metabolic process	0.000123	0.0473	17.1	41	4	P02088	P08228	P01942	P62897
[truncated: 63 more columns]

## Sheet: GO MF
Supplementary table 3. Gene Ontology (GO) enrichment analyses for the 128 differentially abundant proteins assessing Molecular function
GO-term	Description	p-value	FDR	Fold enrichment	Reference list (22265)	Input list (127)	ID-numbers (input list)
GO:0016655	oxidoreductase activity, acting on NAD(P)H, quinone or similar compound as acceptor	8.49E-05	3.27E-02	18.95	37	4	Q9CPP6	P47199	Q8K3J1	Q99LC3
GO:0019843	rRNA binding	6.81E-05	2.86E-02	12.52	70	5	P09405	Q9D8E6	Q61937	Q9CQF0	P62830
GO:0003735	structural constituent of ribosome	4.96E-05	2.86E-02	7.62	161	7	Q9D8E6	P62889	Q9CQF0	Q9D7N3	P62983	Q8K2Y7	P62830
GO:0050662	coenzyme binding	1.13E-06	1.30E-03	6.70	288	11	Q8R1S0	Q8BGT5	P13707	Q9D7B6	P47199	P14152	P38060	Q8BVI4	P29758	Q9JLJ2	Q8CIM3
GO:0048037	cofactor binding	1.40E-08	3.25E-05	5.61	531	17	Q8BGT5	P02088	P13707	P47199	Q8K3J1	Q9WUM5	Q8BVI4	Q9JLJ2	Q8R1S0	Q9D7B6	P14152	P38060	P01942	P29758	P22315	Q8CIM3	P62897
GO:0005198	structural molecule activity	7.29E-09	3.37E-05	5.48	576	18	Q7TPR4	Q9JIF7	Q80YX1	Q61234	Q62059	P68369	Q8CIE6	Q9D8E6	P62889	P38060	P60202	O89029	P02535	Q9CQF0	Q9D7N3	P62983	Q8K2Y7	P62830
GO:0016491	oxidoreductase activity	7.38E-07	1.14E-03	3.99	791	18	Q9CPP6	P02088	P13707	P08228	P47199	Q8K3J1	Q99J47	Q8BVI4	Q9JLJ2	Q9EQ20	Q8R1S0	Q9D7B6	P14152	Q64471	P01942	Q99LC3	Q8CIM3	P62897
GO:0003723	RNA binding	5.17E-05	2.65E-02	2.91	1086	18	P09405	Q7TPR4	Q9D8T7	P47199	P12970	Q61584	Q8CIE6	P42669	P63158	P62960	Q9D8E6	P62889	Q61937	Q9QUM9	Q9CQF0	Q9D7N3	P22315	P62830
GO:0005515	protein binding	9.10E-05	3.23E-02	1.42	9112	74	P13707	P09405	Q8K3J1	Q9D0M5	Q8BVI4	Q9JLJ2	Q62442	P12970	Q6PER3	Q61234	Q8CIE6	P42669	Q01405	O35685	Q8VEH5	Q5FWK3	P48962	P62830	P49813	B9EKR1	P60904	Q7TN29	P02088	Q80U72	P31648	Q9ES97	Q80UP3	Q80YX1	Q62059	O35954	Q9CXI5	Q9QXS6	P62960	P57780	O88447	Q80TN5	Q6PEB6	P01942	Q9QUM9	Q8BNY6	Q3UGY8	P51881	Q9QYA2
GO:0005488	binding	5.53E-05	2.56E-02	1.29	13351	98	P09405	Q6PER3	Q01405	P62075	Q8VEH5	O89029	P48962	Q9D7N3	P49813	B9EKR1	P60904	Q7TN29	Q80U72	P47199	Q9ES97	Q80UP3	Q80YX1	Q9CXI5	Q9QXS6	O88447	Q80TN5	Q6PEB6	P62889	Q9QUM9	Q923S9	Q3UGY8	P51881	Q9ERG0	P28663	Q8BYI9	Q6PB93	P42567	Q8R1S0	P58044	Q61937	Q9D0F3	P22315	Q9D0F9	P62897	Q9CYR0	Q64010	Q9WUM5	O08739
GO:0060089	molecular transducer activity	1.36E-06	1.04E-03	< 0.01	2344	0	-
GO:0038023	signaling receptor activity	1.35E-06	1.25E-03	< 0.01	2339	0	-
GO:0004888	transmembrane signaling receptor activity	5.20E-06	3.43E-03	< 0.01	2139	0	-
[truncated: 55 more columns]
