# Supplementary material for: Quantitative Changes in the Mitochondrial Proteome of Cerebellar Synaptosomes From Preclinical Cystatin B-Deficient Mice
Source: Front Mol Neurosci. 2020 Nov 13;13:570640. doi: 10.3389/fnmol.2020.570640 (PMC7691638; doi:10.3389/fnmol.2020.570640)
Supplement: Supplementary file 7 [file Table_6.xlsx]

## Sheet: Sheet1
Supplementary table 6. Electrophysiological properties of Cstb-/- and wild-type cerebellar granule neurons.
Age	Genotype	n (cells)	Median ΔNNC-711 (pA/pF) [IQR]	p-value (Cstb-/- vs. wt)	Median ΔPicrotoxin (pA/pF) [IQR]	p-value (Cstb-/- vs. wt)	Median capacitance (pF) [IQR]	p-value (Cstb-/- vs. wt)	Median ΔNNC-711/Δpicrotoxin [IQR]	p-value (Cstb-/- vs. wt)
P14	Wild-type	13	-5.8 [-10.9 – -3]		5.7 [3.9 – 9.5]		3.7 [3.5 – 4.1]		-0.7 [-1.5 – -0.3]
	Cstb-/-	6	-5.1 [-7.1 – -4.7]	n.s.a	4.6 [4.4 – 4.8]	n.s.b	3.8 [3.6 – 4.4]	n.s.a	-1.1 [-1.5 – -0.7]	n.s.a
P30	Wild-type	12	-6.2 [-10.5 – -4.7]		11.7 [10.8 – 16.4]		3.9 [3.8 – 4.3]		-0.6 [-0.7 – -0.3]
	Cstb-/-	8	-6.7 [-10.4 – -3.3]	n.s.a	8.5 [6.0 – 12.6]	n.s.b	3.7 [2.8 – 4]	n.s.a	-0.8 [-1.3 – -0.3]	n.s.a
n.s.= not significant (p-val>0.05)
a= two-tailed unpaired t-test
b= non-parametric Mann-Whitney U-test
